# Supplementary material for: Trimester-Specific Serum Fructosamine in Association with Abdominal Adiposity, Insulin Resistance, and Inflammation in Healthy Pregnant Individuals
Source: MDPI journal article supplement (doi:10.3390/nu14193999), 2022-09-27
Supplement: s1 [file s1]

## Supplementary Materials

**Table S1.** Trimester-specific metabolic markers data, according to pre-pregnancy BMI categories

|                                   |                             | First trimester |              | Second trimester |              | Third trimester |              |
|-----------------------------------|-----------------------------|-----------------|--------------|------------------|--------------|-----------------|--------------|
|                                   |                             | n               | Mean ± SD    | n                | Mean ± SD    | n               | Mean ± SD    |
| ppBMI < 25 kg/m <sup>2</sup>      | Adiposity markers           |                 |              |                  |              |                 |              |
|                                   | ppBMI (kg/m <sup>2</sup> )  | 58              | 22.0 ± 1.9   | -                | -            | -               | -            |
|                                   | SAT thickness (mm)          | 53              | 12.9 ± 4.9   | -                | -            | -               | -            |
|                                   | VAT thickness (mm)          | 53              | 20.4 ± 0.1   | -                | -            | -               | -            |
|                                   | Leptin (ng/ml)              | 44              | 20.9 ± 10.8  | 44               | 24.5 ± 11.7  | 44              | 26.0 ± 14.5  |
|                                   | Glucose homeostasis markers |                 |              |                  |              |                 |              |
|                                   | Fasting glucose (mmol/L)    | 58              | 4.4 ± 0.3    | 57               | 4.4 ± 0.4    | 58              | 4.5 ± 0.4    |
|                                   | Fasting insulin (pmol/L)    | 56              | 49.9 ± 21.6  | 55               | 58.6 ± 21.1  | 56              | 77.2 ± 26.8  |
|                                   | HOMA-IR                     | 56              | 1.4 ± 0.6    | 55               | 1.7 ± 0.7    | 56              | 2.2 ± 0.9    |
|                                   | Inflammation markers        |                 |              |                  |              |                 |              |
|                                   | Adiponectin (mg/ml)         | 42              | 11.4 ± 2.8   | 42               | 10.2 ± 3.1   | 42              | 8.3 ± 2.8    |
|                                   | IL-6 (pg/ml)                | 39              | 0.8 ± 0.5    | 39               | 1.1 ± 1.0    | 39              | 1.4 ± 0.8    |
|                                   | CRP (mg/L)                  | 42              | 5.6 ± 7.3    | 42               | 4.5 ± 3.7    | 42              | 4.8 ± 5.8    |
| 25 < ppBMI < 30 kg/m <sup>2</sup> | Adiposity markers           |                 |              |                  |              |                 |              |
|                                   | ppBMI (kg/m <sup>2</sup> )  | 25              | 26.8 ± 1.4   | -                | -            | -               | -            |
|                                   | SAT thickness (mm)          | 24              | 19.6 ± 5.6   | -                | -            | -               | -            |
|                                   | VAT thickness (mm)          | 24              | 29.5 ± 10.3  | -                | -            | -               | -            |
|                                   | Leptin (ng/ml)              | 19              | 43.2 ± 14.4  | 19               | 43.1 ± 13.4  | 19              | 47.2 ± 16.2  |
|                                   | Glucose homeostasis markers |                 |              |                  |              |                 |              |
|                                   | Fasting glucose (mmol/L)    | 25              | 4.6 ± 0.4    | 25               | 4.5 ± 0.4    | 24              | 4.8 ± 0.7    |
|                                   | Fasting insulin (pmol/L)    | 24              | 63.9 ± 19.0  | 23               | 79.6 ± 21.5  | 21              | 103.7 ± 32.4 |
|                                   | HOMA-IR                     | 24              | 1.9 ± 0.6    | 23               | 2.3 ± 0.7    | 21              | 3.1 ± 1.1    |
|                                   | Inflammation markers        |                 |              |                  |              |                 |              |
|                                   | Adiponectin (mg/ml)         | 19              | 8.8 ± 2.8    | 19               | 8.4 ± 3.0    | 19              | 7.2 ± 2.7    |
|                                   | IL-6 (pg/ml)                | 18              | 1.1 ± 0.6    | 18               | 1.0 ± 0.5    | 18              | 1.5 ± 0.8    |
|                                   | CRP                         | 19              | 7.5 ± 7.7    | 19               | 6.24 ± 3.4   | 19              | 8.0 ± 6.1    |
| ppBMI > 30 kg/m <sup>2</sup>      | Adiposity markers           |                 |              |                  |              |                 |              |
|                                   | ppBMI (kg/m <sup>2</sup> )  | 18              | 35.0 ± 4.7   | -                | -            | -               | -            |
|                                   | SAT thickness (mm)          | 18              | 27.5 ± 5.7   | -                | -            | -               | -            |
|                                   | VAT thickness (mm)          | 18              | 43.2 ± 19.3  | -                | -            | -               | -            |
|                                   | Leptin (ng/ml)              | 14              | 60.4 ± 15.8  | 14               | 78.3 ± 36.9  | 14              | 81.1 ± 24.2  |
|                                   | Glucose homeostasis markers |                 |              |                  |              |                 |              |
|                                   | Fasting glucose (mmol/L)    | 18              | 4.6 ± 0.4    | 18               | 4.6 ± 0.4    | 18              | 4.8 ± 0.4    |
|                                   | Fasting insulin (pmol/L)    | 17              | 105.4 ± 48.2 | 18               | 118.1 ± 68.6 | 18              | 153.1 ± 66.5 |
|                                   | HOMA-IR                     | 17              | 3.1 ± 1.6    | 18               | 3.6 ± 2.3    | 18              | 4.8 ± 2.3    |
|                                   | Inflammation markers        |                 |              |                  |              |                 |              |
|                                   | Adiponectin (mg/ml)         | 14              | 8.8 ± 3.5    | 14               | 7.2 ± 2.4    | 14              | 7.0 ± 2.2    |
|                                   | IL-6 (pg/ml)                | 15              | 1.5 ± 0.6    | 15               | 1.8 ± 0.8    | 15              | 1.8 ± 1.3    |
|                                   | CRP (mg/L)                  | 12              | 11.2 ± 6.1   | 12               | 13.8 ± 7.6   | 12              | 10.1 ± 4.3   |

PpBMI, pre-pregnancy body mass index; SAT, subcutaneous adipose tissue; VAT, visceral adipose tissue; HOMA-IR, homeostasis model assessment of insulin resistance; IL-6, interleukin-6; CRP, C-reactive protein.
